# Supplementary material
Source: Springer Nature journal article supplement (https://www.springermedizin.de/resource/supplementary/13045_2010_140_MOESM14_ESM.pdf/9660844)

Fig. 7

SUP-B15 (resistant)

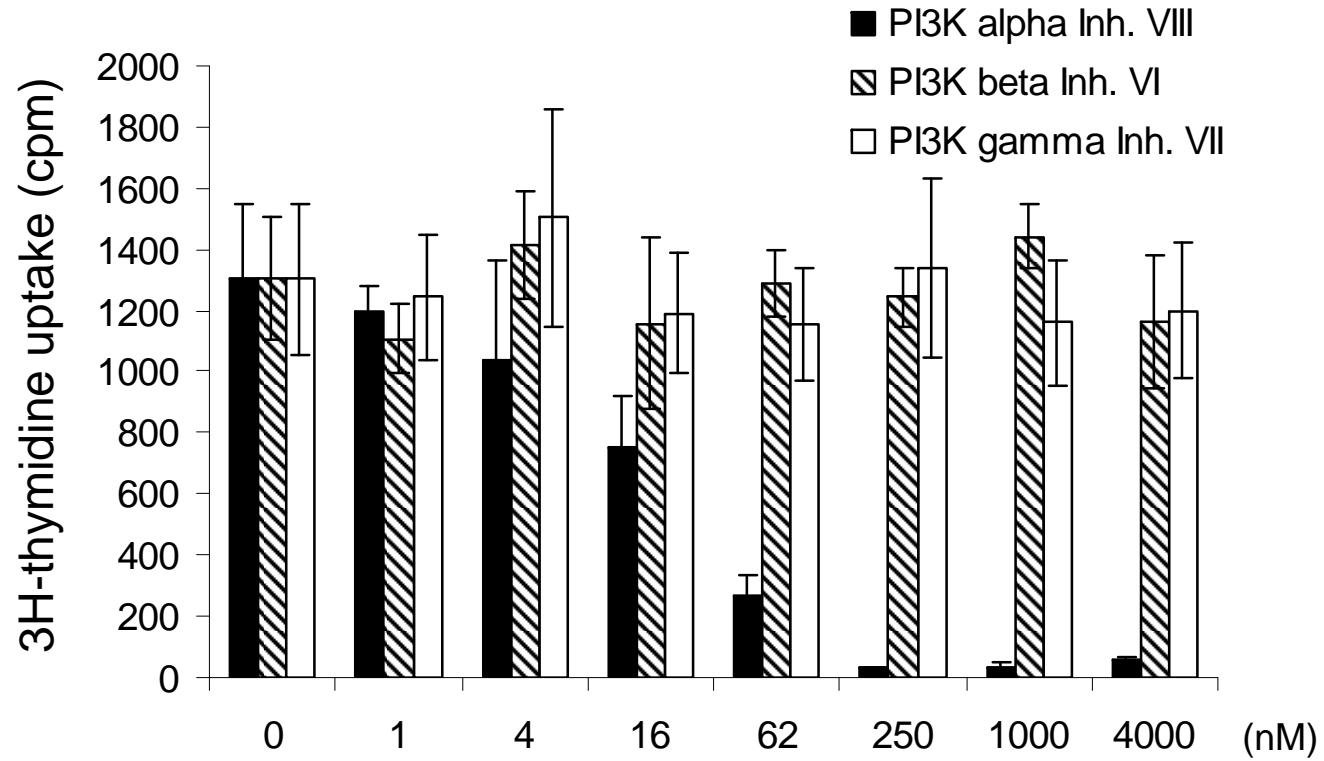

Supplement: MOESM14 [file 9660844]
